# Supplementary material for: Associations of 16-Year Population Dynamics in Range-Expanding Moths with Temperature and Years since Establishment
Source: MDPI journal article supplement (doi:10.3390/insects14010055), 2023-01-06

# Associations of 16-year population dynamics in range-expanding moths with temperature and years since establishment

Per-Eric Betzholtz<sup>1\*</sup>, Anders Forsman<sup>1</sup> & Markus Franzén<sup>1</sup>

<sup>1</sup> Department of Biology and Environmental Science, Linnaeus University, SE-39182 Kalmar, Sweden

\* Correspondence: per-eric.betzholtz@lnu.se

## SUPPLEMENTARY INFORMATION

**Table S1.** The 107 range-expanding moths arranged in taxonomic order of their family, subfamily and yearly abundance sorted taxonomically.

| Family    | Subfamily    | Species/Year                   | 2005 | 2006 | 2007 | 2008 | 2009 | 2010 | 2011 | 2012 | 2013 | 2014 | 2015 | 2016 | 2017 | 2018 | 2019 | 2020 | Total |
|-----------|--------------|--------------------------------|------|------|------|------|------|------|------|------|------|------|------|------|------|------|------|------|-------|
| Pyralidae | Phycitinae   | <i>Oncocera semirubella</i>    |      | 2    | 2    | 2    | 3    |      | 1    | 3    | 7    | 11   | 4    | 5    | 2    | 5    | 6    | 6    | 59    |
| Pyralidae | Phycitinae   | <i>Sciota fumella</i>          |      |      |      |      |      |      | 1    |      |      | 1    |      | 3    |      | 4    |      | 3    | 12    |
| Pyralidae | Phycitinae   | <i>Sciota adelphella</i>       | 1    |      | 2    | 3    |      | 12   | 11   | 2    |      | 4    | 1    |      | 1    | 4    | 3    |      | 44    |
| Pyralidae | Phycitinae   | <i>Nephoterix angustella</i>   |      |      | 3    | 1    |      |      |      |      | 3    | 1    |      | 2    | 2    | 50   | 8    | 1    | 71    |
| Pyralidae | Pyralinae    | <i>Pyralis regalis</i>         |      |      |      |      |      |      |      |      |      |      |      |      | 2    | 3    | 13   | 8    | 26    |
| Crambidae | Pyraustinae  | <i>Loxostege turbidalis</i>    |      |      |      |      |      |      |      | 2    |      |      | 1    |      |      |      |      |      | 3     |
| Crambidae | Pyraustinae  | <i>Loxostege sticticalis</i>   |      | 8    | 7    | 5    | 8    | 4    | 10   | 3    | 1    | 1    |      | 1    |      | 1    | 22   | 8    | 79    |
| Crambidae | Pyraustinae  | <i>Nascia ciliatilis</i>       |      |      |      |      |      |      | 3    |      |      |      |      | 2    | 2    | 2    | 1    | 3    | 13    |
| Crambidae | Pyraustinae  | <i>Ostrinia palustralis</i>    | 2    | 4    | 1    |      | 1    |      |      |      |      |      |      |      | 1    | 1    | 1    |      | 11    |
| Crambidae | Pyraustinae  | <i>Anania verbascalis</i>      | 1    |      | 8    | 3    | 4    | 2    | 15   | 4    | 15   | 11   | 4    | 1    | 2    | 5    | 11   | 22   | 108   |
| Crambidae | Spilomelinae | <i>Udea ferrugalis</i>         |      | 1    |      |      |      |      |      |      |      |      |      |      |      |      | 12   | 5    | 18    |
| Crambidae | Spilomelinae | <i>Udea accolalis</i>          |      |      |      |      |      |      |      |      |      |      |      |      |      | 19   |      |      | 19    |
| Crambidae | Spilomelinae | <i>Diseamia reticularis</i>    |      |      |      |      |      |      | 1    |      |      | 1    | 2    | 1    |      | 15   | 5    |      | 25    |
| Crambidae | Spilomelinae | <i>Nomophila noctuella</i>     | 1    | 38   | 95   | 1    | 1    | 105  | 3    | 12   | 20   | 87   | 34   | 5    | 1    | 50   | 236  | 8    | 697   |
| Crambidae | Spilomelinae | <i>Antigastra catalaunalis</i> |      | 1    |      |      |      |      |      |      |      |      |      |      |      |      |      |      | 1     |

|              |                 |                                  |    |    |    |    |    |    |     |    |     |     |    |    |    |     |    |    |     |
|--------------|-----------------|----------------------------------|----|----|----|----|----|----|-----|----|-----|-----|----|----|----|-----|----|----|-----|
| Crambidae    | Spilomelinae    | <i>Palpita vitrealis</i>         |    |    |    |    |    |    |     |    | 2   |     | 2  |    | 1  | 2   | 5  | 12 |     |
| Crambidae    | Glaphyriinae    | <i>Evergestis frumentalis</i>    |    |    |    |    |    | 1  |     |    |     |     |    |    |    |     |    | 1  |     |
| Crambidae    | Crambinae       | <i>Euchromius ocella</i>         |    |    | 2  |    |    |    |     |    | 1   |     |    | 1  |    | 3   | 8  | 15 |     |
| Drepanidae   | Drepaninae      | <i>Watsonalla binaria</i>        |    | 1  |    | 1  | 5  | 8  | 45  | 15 | 49  | 102 | 45 | 89 | 46 | 296 | 51 | 49 | 802 |
| Drepanidae   | Drepaninae      | <i>Watsonalla cultraria</i>      |    |    |    |    |    |    |     |    |     |     | 4  |    |    |     |    | 4  |     |
| Drepanidae   | Drepaninae      | <i>Drepana curvatula</i>         |    | 1  | 2  |    |    | 1  | 1   |    |     | 1   | 1  |    | 1  | 3   | 1  | 12 |     |
| Geometridae  | Sterrhinae      | <i>Cyclophora annularia</i>      |    |    |    |    |    |    |     |    |     |     | 1  |    |    |     |    | 1  |     |
| Geometridae  | Sterrhinae      | <i>Cyclophora porata</i>         |    |    |    | 1  |    |    |     |    |     |     |    | 3  | 2  |     |    | 6  |     |
| Geometridae  | Sterrhinae      | <i>Cyclophora linearia</i>       | 1  | 5  |    |    | 5  | 1  | 3   |    | 2   |     | 1  | 2  |    | 5   | 5  | 30 |     |
| Geometridae  | Sterrhinae      | <i>Idaea ochrata</i>             |    | 1  |    |    | 2  | 2  | 1   |    |     |     | 1  | 1  | 2  | 6   | 9  | 29 |     |
| Geometridae  | Larentiinae     | <i>Orthonama obstipata</i>       | 1  |    |    |    |    | 1  |     |    |     |     |    | 1  |    |     | 1  | 4  |     |
| Geometridae  | Larentiinae     | <i>Xanthorhoe biriviata</i>      |    |    |    |    |    |    |     |    |     |     | 1  | 1  |    |     |    | 2  |     |
| Geometridae  | Larentiinae     | <i>Catarhoe rubidata</i>         |    |    |    | 1  |    |    |     |    | 1   |     | 1  |    | 3  | 1   |    | 7  |     |
| Geometridae  | Larentiinae     | <i>Costaconvexa polygrammata</i> |    | 1  |    |    |    |    |     | 1  |     |     |    |    |    |     | 1  | 3  |     |
| Geometridae  | Larentiinae     | <i>Horisme corticata</i>         |    |    |    |    |    |    |     |    |     |     |    | 1  |    |     |    | 1  |     |
| Geometridae  | Larentiinae     | <i>Chloroclystis v-ata</i>       | 2  |    | 3  | 3  | 2  | 4  | 6   |    | 10  | 3   | 7  | 15 | 27 | 45  | 15 | 13 | 155 |
| Geometridae  | Larentiinae     | <i>Eupithecia pulchellata</i>    |    |    |    |    |    |    |     |    |     |     |    |    |    |     | 1  | 1  |     |
| Geometridae  | Larentiinae     | <i>Chesias legatella</i>         | 1  |    |    | 1  |    |    |     |    |     | 1   | 1  | 1  | 5  | 1   | 3  | 14 |     |
| Geometridae  | Ennominae       | <i>Fagivorina arenaria</i>       |    | 1  |    |    |    |    |     |    |     |     |    |    |    |     |    | 1  |     |
| Geometridae  | Geometrinae     | <i>Thetidia smaragdaria</i>      | 1  |    |    |    |    |    |     | 2  |     | 1   | 1  | 2  | 1  | 5   |    | 1  | 14  |
| Sphingidae   | Sphinginae      | <i>Agrius convolvuli</i>         | 17 | 6  | 5  | 1  | 2  | 7  | 7   | 1  | 8   |     | 1  |    | 2  | 3   | 3  |    | 63  |
| Sphingidae   | Macroglossinae  | <i>Hyles euphorbiae</i>          |    |    |    |    |    |    | 2   |    |     |     |    |    |    |     |    |    | 2   |
| Sphingidae   | Macroglossinae  | <i>Hyles gallii</i>              |    | 11 | 93 | 16 | 26 | 70 | 108 | 30 | 120 | 56  | 56 | 34 | 60 | 22  | 50 | 32 | 784 |
| Notodontidae | Thaumetopoeinae | <i>Thaumetopoea pinivora</i>     |    |    | 7  |    |    |    |     |    |     |     |    |    |    |     |    |    | 7   |
| Notodontidae | Notodontinae    | <i>Notodonta tritophus</i>       | 2  | 3  | 4  |    | 4  | 1  | 7   | 5  | 5   | 5   | 8  | 4  | 7  | 5   | 5  | 6  | 71  |
| Notodontidae | Pygaerinae      | <i>Clostera anachoreta</i>       | 1  |    |    |    |    |    |     |    |     |     |    |    |    |     |    | 1  | 2   |
| Erebidae     | Hypeninae       | <i>Colobochyla salicalis</i>     |    | 1  |    |    |    | 1  | 4   | 4  | 1   | 1   | 4  | 6  | 5  | 1   | 2  | 2  | 32  |
| Erebidae     | Nygmiini        | <i>Euproctis chrysorrhoea</i>    |    | 31 |    |    |    |    | 1   | 2  |     | 1   |    | 2  | 1  |     |    | 1  | 39  |
| Erebidae     | Lithosiini      | <i>Pelosia muscerda</i>          | 2  | 5  | 1  |    | 6  | 8  | 8   | 2  | 4   | 8   | 32 | 44 | 22 | 32  | 18 | 38 | 230 |

|           |                  |                                  |    |    |    |    |    |     |     |    |    |     |     |      |     |     |      |      |      |
|-----------|------------------|----------------------------------|----|----|----|----|----|-----|-----|----|----|-----|-----|------|-----|-----|------|------|------|
| Erebidae  | Lithosiini       | <i>Pelosa obtusa</i>             | 2  | 5  |    | 6  |    | 1   | 2   | 2  | 4  | 3   |     |      | 1   | 3   | 3    | 2    | 34   |
| Erebidae  | Lithosiini       | <i>Lithosia quadra</i>           |    | 1  | 1  | 8  | 4  | 3   | 16  | 12 | 5  | 20  | 13  | 3    | 16  | 15  | 9    | 4    | 130  |
| Erebidae  | Lithosiini       | <i>Eilema griseola</i>           |    |    |    |    | 1  |     | 1   |    |    |     | 4   | 1    | 1   | 4   |      | 3    | 15   |
| Erebidae  | Arctiini         | <i>Callimorpha dominula</i>      |    |    | 1  |    |    |     |     |    |    |     |     |      |     |     |      |      | 1    |
| Erebidae  | Boletobiinae     | <i>Eublemma purpurina</i>        |    |    |    |    |    |     |     |    |    |     |     |      |     |     | 1    |      | 1    |
| Erebidae  | Erebinae         | <i>Minucia lunaris</i>           |    | 1  |    |    |    |     |     |    |    |     |     |      |     |     |      |      | 1    |
| Erebidae  | Erebinae         | <i>Grammodes stolidia</i>        |    |    |    |    |    |     |     |    |    |     |     |      |     |     | 1    |      | 1    |
| Erebidae  | Erebinae         | <i>Catocala fulminea</i>         |    |    |    |    |    |     | 1   | 2  |    |     |     |      |     | 1   |      |      | 4    |
| Erebidae  | Erebinae         | <i>Catocala fraxini</i>          | 11 | 35 | 9  | 3  | 9  |     | 30  | 7  | 8  | 5   | 8   | 9    | 8   | 4   | 11   | 10   | 167  |
| Erebidae  | Erebinae         | <i>Catocala nupta</i>            | 3  | 15 | 18 | 5  | 5  | 8   | 47  | 4  | 13 | 4   | 9   | 12   | 15  | 10  | 12   | 10   | 190  |
| Noctuidae | Acontiinae       | <i>Acontia trabalis</i>          | 2  | 2  | 11 | 2  |    | 6   | 54  | 43 | 8  | 3   | 1   | 5    |     | 15  | 2    | 13   | 167  |
| Noctuidae | Plusiinae        | <i>Abrostola triplasia</i>       | 59 | 24 | 93 | 87 | 72 | 80  | 170 | 89 | 67 | 127 | 75  | 73   | 202 | 106 | 70   | 85   | 1479 |
| Noctuidae | Plusiinae        | <i>Trichoplusia ni</i>           |    |    | 1  |    |    |     |     |    |    |     |     |      |     |     |      |      | 1    |
| Noctuidae | Plusiinae        | <i>Macdunnoughia confusa</i>     | 4  | 21 | 35 | 7  | 12 | 6   | 15  | 4  | 13 | 11  | 6   | 2    | 10  | 14  | 17   | 16   | 193  |
| Noctuidae | Plusiinae        | <i>Autographa mandarina</i>      | 7  | 15 | 9  |    | 4  | 3   | 61  | 7  |    | 1   |     |      |     |     |      |      | 107  |
| Noctuidae | Plusiinae        | <i>Syngrapha interrogationis</i> | 2  | 8  |    | 2  |    | 1   | 4   | 6  | 7  | 7   | 1   |      |     | 2   |      | 1    | 41   |
| Noctuidae | Cuculliinae      | <i>Cucullia fraudatrix</i>       |    |    |    |    |    |     | 2   | 1  |    |     |     | 4    |     | 1   |      | 2    | 10   |
| Noctuidae | Cuculliinae      | <i>Cucullia artemisiae</i>       |    | 1  |    |    |    |     |     |    | 1  |     |     | 1    |     |     |      |      | 3    |
| Noctuidae | Cuculliinae      | <i>Cucullia scrophulariae</i>    |    |    |    |    |    |     |     |    |    |     |     |      |     |     | 1    | 2    | 3    |
| Noctuidae | Eustrotiinae     | <i>Deltote deceptor</i>          |    | 1  |    |    |    |     | 7   | 5  | 1  |     |     |      |     |     |      |      | 14   |
| Noctuidae | Acronictinae     | <i>Acronicta albovenosa</i>      | 6  | 12 | 5  | 23 | 15 | 9   | 14  | 7  | 28 | 48  | 7   | 8    | 2   | 98  | 44   | 41   | 367  |
| Noctuidae | Condicinae       | <i>Eucarta virgo</i>             | 4  | 14 | 26 | 9  | 9  | 136 | 138 | 31 | 25 | 91  | 24  | 27   | 18  | 83  | 17   | 10   | 662  |
| Noctuidae | Heliothinae      | <i>Heliothis peltigera</i>       |    |    | 1  |    |    |     |     |    |    |     | 1   |      |     |     |      |      | 2    |
| Noctuidae | Heliothinae      | <i>Heliothis virescens</i>       |    | 5  | 5  | 3  | 1  | 10  | 3   |    |    | 6   | 3   |      |     | 3   | 24   | 23   | 86   |
| Noctuidae | Heliothinae      | <i>Helicoverpa armigera</i>      |    | 3  |    |    |    |     |     |    |    | 7   | 7   |      | 8   |     | 4    | 1    | 30   |
| Noctuidae | Bryophilinae     | <i>Cryphia algae</i>             |    |    |    |    |    |     | 1   |    |    | 1   | 2   | 1    | 3   | 4   | 64   | 114  | 190  |
| Noctuidae | Pseudeustrotiini | <i>Pseudeustrotia candidula</i>  | 2  | 7  | 16 | 7  | 5  | 11  | 138 | 14 | 44 | 87  | 9   | 11   | 35  | 35  | 337  | 92   | 850  |
| Noctuidae | Prodeniini       | <i>Spodoptera exigua</i>         |    |    |    |    |    |     |     |    |    |     | 6   |      |     | 4   | 1    | 1    | 12   |
| Noctuidae | Caradrinini      | <i>Hoplodrina ambigua</i>        | 2  | 1  | 3  | 19 | 94 | 10  | 16  | 37 | 33 | 91  | 587 | 1186 | 632 | 513 | 3284 | 1575 | 8083 |
| Noctuidae | Caradrinini      | <i>Proxenus lepigone</i>         |    |    | 1  |    |    |     |     |    |    |     |     | 12   | 3   | 2   | 18   | 7    | 43   |

|           |               |                               |     |    |     |     |     |     |    |    |     |     |     |     |     |     |     |     |      |
|-----------|---------------|-------------------------------|-----|----|-----|-----|-----|-----|----|----|-----|-----|-----|-----|-----|-----|-----|-----|------|
| Noctuidae | Phlogophorini | <i>Phlogophora meticulosa</i> | 54  | 61 | 199 | 115 | 53  | 3   | 13 | 43 | 23  | 73  | 366 | 155 | 49  | 81  | 109 | 243 | 1640 |
| Noctuidae | Apameini      | <i>Hydraecia ultima</i>       |     | 7  | 5   |     | 1   | 3   | 49 | 4  | 2   | 12  | 3   |     | 1   | 1   |     |     | 88   |
| Noctuidae | Apameini      | <i>Sedina buettneri</i>       |     |    |     |     |     |     | 2  |    | 1   | 2   | 2   | 2   |     | 1   |     | 2   | 12   |
| Noctuidae | Apameini      | <i>Archanara neurica</i>      |     |    |     |     |     | 1   |    |    |     |     |     |     |     |     |     |     | 1    |
| Noctuidae | Apameini      | <i>Coenobia rufa</i>          |     |    |     |     |     |     |    |    |     |     |     | 1   | 1   | 13  | 16  | 43  | 74   |
| Noctuidae | Apameini      | <i>Photodes extrema</i>       |     |    |     | 1   |     | 1   |    |    |     |     |     |     |     |     |     |     | 2    |
| Noctuidae | Apameini      | <i>Globia sparganii</i>       |     |    | 1   | 2   |     | 3   | 1  |    | 4   | 3   | 7   | 1   | 1   | 4   | 8   | 8   | 43   |
| Noctuidae | Apameini      | <i>Globia algae</i>           |     |    | 1   |     | 1   | 1   |    | 1  | 2   | 7   | 4   | 2   | 1   | 6   | 11  | 4   | 41   |
| Noctuidae | Xylenini      | <i>Cirrhia gilvago</i>        | 4   | 11 | 2   |     | 1   | 1   | 2  | 1  | 10  | 6   | 1   | 9   | 2   | 15  | 4   |     | 69   |
| Noctuidae | Xylenini      | <i>Agrochola lychnidis</i>    |     |    |     |     | 1   |     | 1  | 2  |     |     | 1   | 1   |     |     | 1   |     | 7    |
| Noctuidae | Xylenini      | <i>Xylena exsoleta</i>        |     |    |     |     |     |     |    |    |     |     |     | 1   |     |     |     |     | 1    |
| Noctuidae | Xylenini      | <i>Cosmia affinis</i>         |     |    |     |     |     |     |    | 1  |     |     | 1   |     |     |     | 1   | 1   | 4    |
| Noctuidae | Xylenini      | <i>Atethmia centrugo</i>      |     |    |     |     |     |     |    |    |     |     |     |     |     |     | 1   | 2   | 3    |
| Noctuidae | Xylenini      | <i>Blepharita amica</i>       |     |    |     |     |     |     | 1  |    |     |     |     |     | 1   |     | 1   |     | 3    |
| Noctuidae | Hadenini      | <i>Lacanobia splendens</i>    |     |    |     |     |     |     | 1  |    |     |     |     | 1   |     | 1   |     |     | 3    |
| Noctuidae | Hadenini      | <i>Conisania leineri</i>      |     |    |     |     |     |     | 1  |    |     |     |     |     |     |     |     |     | 1    |
| Noctuidae | Leucaniini    | <i>Mythimna turca</i>         | 9   | 11 | 2   | 5   | 4   | 7   | 12 | 13 | 24  | 20  | 19  | 23  | 35  | 29  | 6   | 4   | 223  |
| Noctuidae | Leucaniini    | <i>Mythimna vitellina</i>     |     | 4  |     |     |     |     |    |    |     |     |     |     | 2   |     |     | 1   | 7    |
| Noctuidae | Leucaniini    | <i>Mythimna albipuncta</i>    | 4   | 9  | 4   | 15  | 31  | 15  | 12 |    | 1   | 29  | 102 | 184 | 88  | 30  | 137 | 227 | 888  |
| Noctuidae | Leucaniini    | <i>Mythimna l-album</i>       |     |    |     |     |     |     |    |    | 2   | 8   | 2   |     |     | 1   | 4   | 2   | 19   |
| Noctuidae | Noctuini      | <i>Peridroma saucia</i>       | 2   | 1  |     |     |     |     |    |    |     |     |     |     |     |     |     |     | 3    |
| Noctuidae | Noctuini      | <i>Actebia praecox</i>        | 3   | 4  | 2   | 2   | 12  | 13  | 22 | 24 | 67  | 26  | 51  | 42  | 27  | 28  | 36  | 30  | 389  |
| Noctuidae | Noctuini      | <i>Agrotis bigramma</i>       |     |    |     |     |     |     |    |    |     | 1   | 1   |     |     |     |     |     | 2    |
| Noctuidae | Noctuini      | <i>Agrotis ripae</i>          |     | 3  | 1   | 1   | 6   | 6   | 8  | 2  | 5   | 7   | 5   | 5   | 3   | 37  | 7   | 16  | 112  |
| Noctuidae | Noctuini      | <i>Agrotis puta</i>           |     |    |     |     |     |     |    |    |     |     |     |     |     | 1   | 2   | 2   | 5    |
| Noctuidae | Noctuini      | <i>Agrotis ipsilon</i>        | 3   | 87 | 79  | 8   | 5   | 17  | 25 | 18 | 10  | 28  | 26  | 35  | 14  | 208 | 11  | 10  | 584  |
| Noctuidae | Noctuini      | <i>Chersotis cuprea</i>       |     | 1  | 1   | 1   | 1   |     |    | 2  |     |     |     |     |     |     |     |     | 6    |
| Noctuidae | Noctuini      | <i>Noctua interposita</i>     |     |    | 2   |     | 2   | 1   | 2  |    |     |     | 3   | 3   | 5   | 17  | 9   | 10  | 54   |
| Noctuidae | Noctuini      | <i>Noctua janthina</i>        | 103 | 35 | 17  | 37  | 71  | 34  | 62 | 60 | 136 | 244 | 58  | 102 | 62  | 69  | 24  | 30  | 1144 |
| Noctuidae | Noctuini      | <i>Noctua interjecta</i>      | 51  | 2  | 19  | 54  | 136 | 127 | 64 | 35 | 62  | 273 | 212 | 713 | 481 | 543 | 281 | 215 | 3268 |
| Noctuidae | Noctuini      | <i>Xestia alpicola</i>        |     |    |     |     |     |     | 2  |    |     |     |     |     |     |     |     |     | 2    |
| Noctuidae | Noctuini      | <i>Xestia ditrapezium</i>     |     |    |     |     |     |     | 1  |    |     |     | 1   | 1   | 3   | 6   | 1   | 1   | 14   |
| Nolidae   | Chloephorinae | <i>Nycteola asiatica</i>      |     | 2  | 1   | 1   |     |     |    |    |     |     | 3   | 1   | 1   |     |     |     | 9    |

**Figure S1.** Average ambient air temperature during May - July at the WMO meteorological station Ölands södra udde during the study period 2005 - 2020.

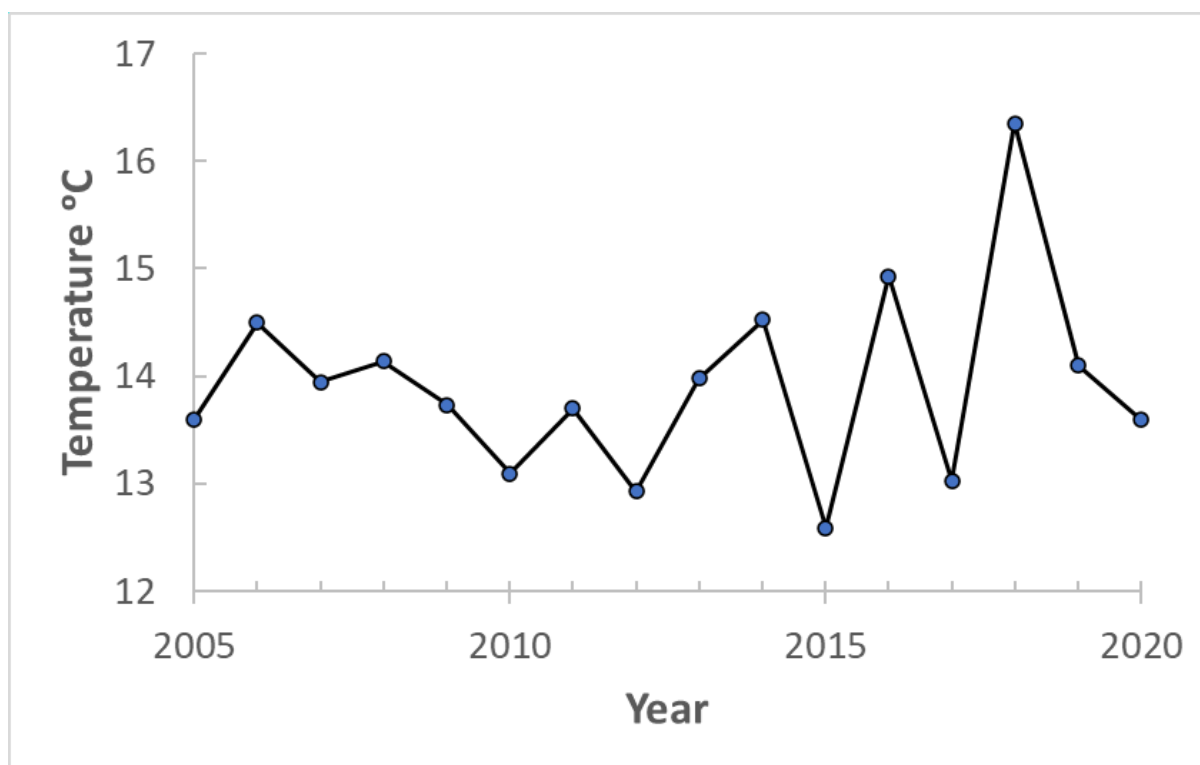

Supplement: s1 [file s1]
